# Supplementary material for: Oscillatory dynamics during the methanol electrooxidation reaction on Pt(111)
Source: Royal Society of Chemistry journal article supplement (doi:10.1039/d1cp02490f), 2021-01-01
Supplement: d1cp02490f1.pdf [file d1cp02490f1.pdf]

## Supplementary Files

### Oscillatory Dynamics during Methanol Electrooxidation Reaction on Pt(111)

Kaline Nascimento da Silva<sup>a</sup>, Elton Sitta<sup>a,b\*</sup>

*a* Chemistry Department, Federal University of Sao Carlos, Rod. Washington Luis, km 235, Sao Carlos, Brazil. ZIP code 13565-905

*b* Center for Innovation on New Energies, University of Campinas, CEP 13083-841 Campinas, SP, Brazil

\*e-mail: [esitta@ufscar.br](mailto:esitta@ufscar.br)

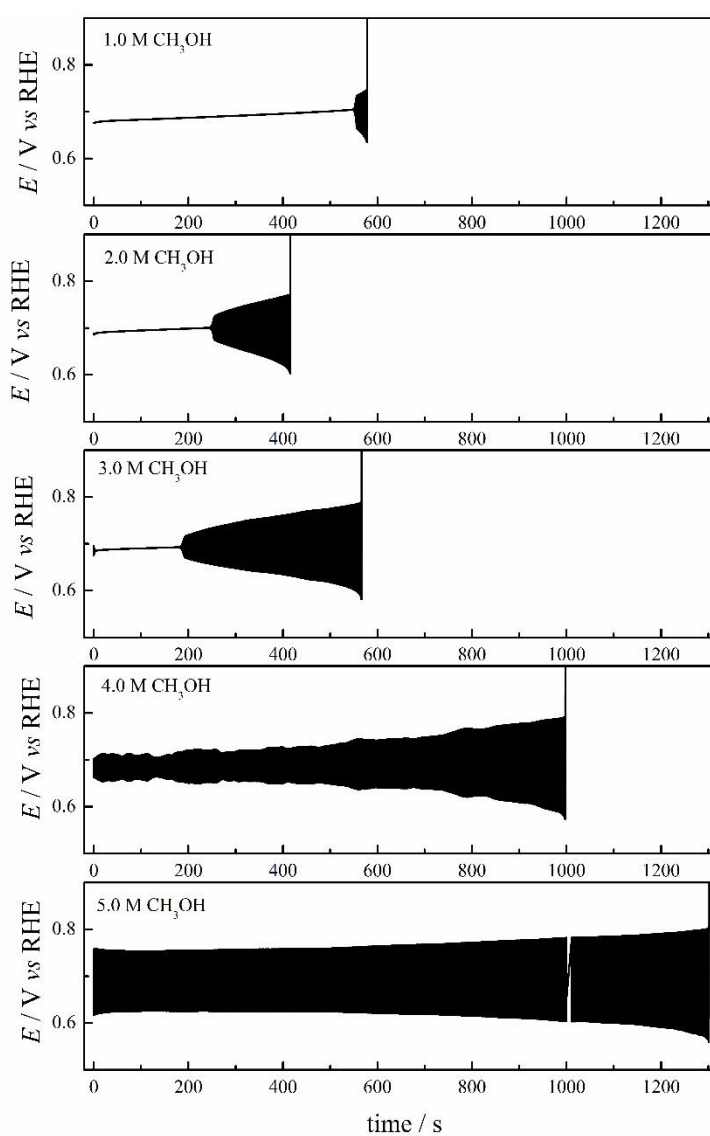

Figure S 1 - Galvanostatic time-series for Pt(111) at distinct methanol concentrations.

## Mean potential calculus for each oscillation cycle

The mean potential ( $E_m$ ) was estimated by the potential integration between two subsequent minimum potentials ( $n_{\min}$  and  $n+1_{\min}$ ) of one oscillation cycle over time and dividing these value by the time interval as shown by the equation:<sup>1</sup>

$$E_m = \frac{1}{t_{n+1 \min} - t_{n \min}} \int_{t_{n \min}}^{t_{n+1 \min}} E dt$$

The  $dE/dt$  versus time evolution for the time-series with methanol concentration higher than 3.5 M are shown on Figure S 2

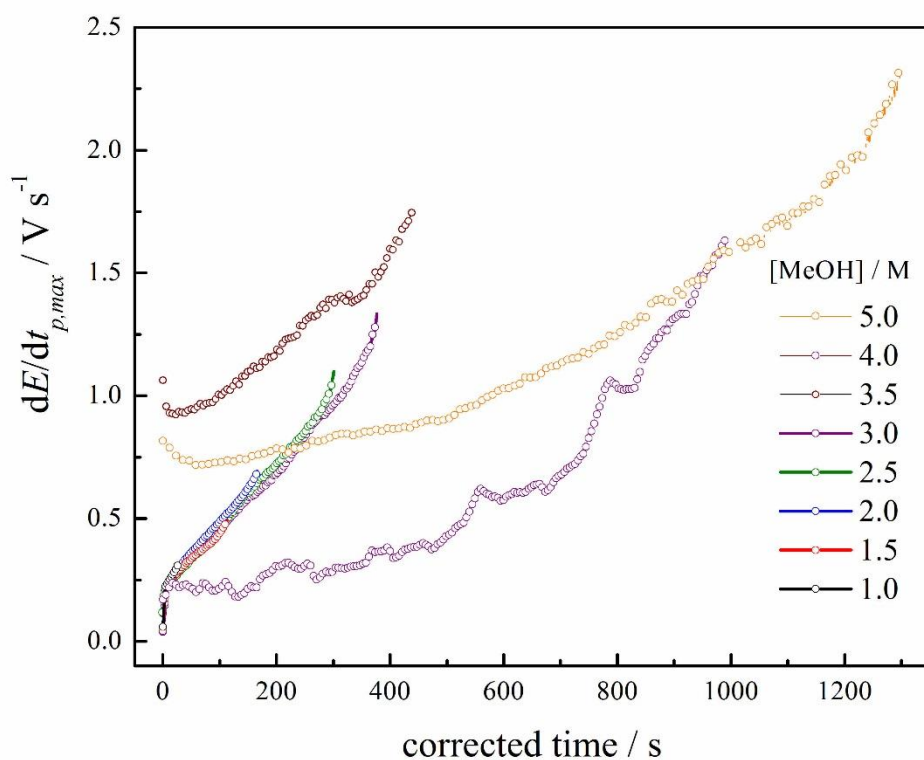

Figure S 2 - Maximum poisoning rate ( $dE/dt_{p,max}$ ) for each oscillation cycle along the whole time-series in distinct methanol concentrations

<sup>1</sup> M. Cabral et al. Phys.Chem. Chem. Phys., 2013, 15, 1437
